# Supplementary material
Source: MDPI journal article supplement (https://www.mdpi.com/1424-2818/12/10/393)

Supplementary Document.

Figure S1: Examples of Chihuahuan Desert aquatic systems. Left to right. Upper panel: stream – Lost River (WHSA, NM, USA); reservoir – Presa de al Boquilla (Chihuahua, MX). Middle panel: rock pool – Ernst Tinaja 4 (BIBE, TX, USA); playa – Columbus Playa (NM, USA). Lower panel: tank – Tule Cattle Tank (BIBE, TX, USA); Poza Azul (Cuatro Ciénegas, Coahuila, MX).

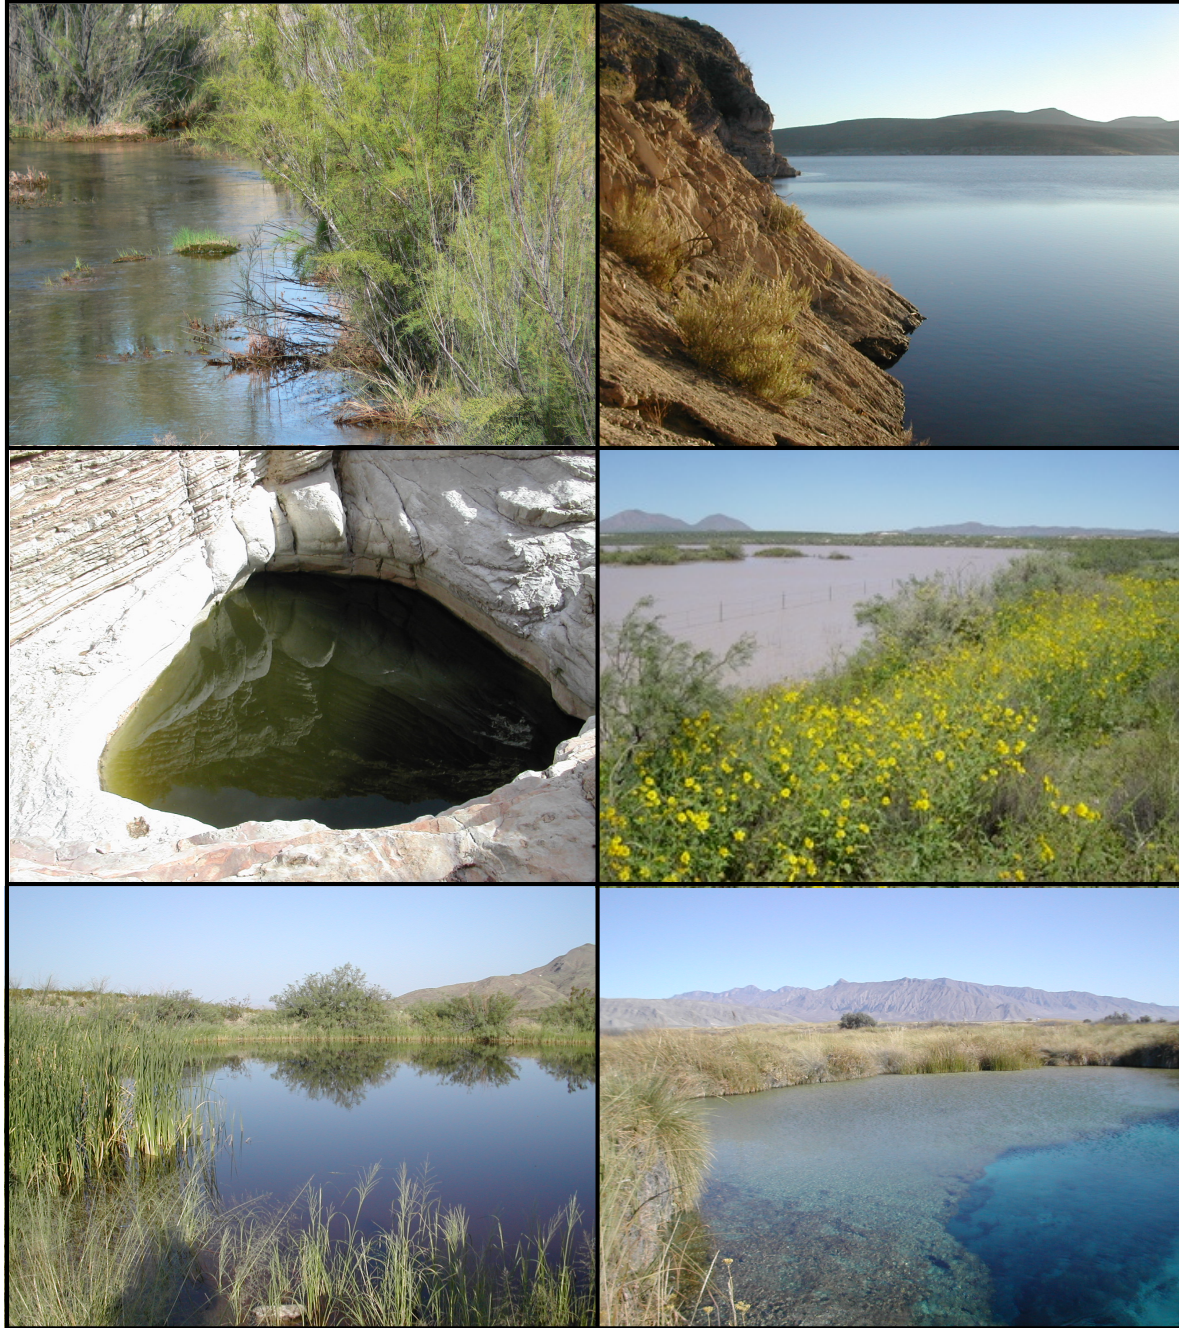

Supplement: s1 [file s1]
